# Supplementary material for: Three-dimensional porous V2O5 cathode with ultra high rate capability
Source: Royal Society of Chemistry journal article supplement (doi:10.1039/c1ee01172c), 2011-01-01
Supplement: c1ee01172c.pdf [file c1ee01172c.pdf]

Supplementary Material (ESI) for Energy & Environmental Science

**Three-dimensional porous  $V_2O_5$  cathode with a ultra high rate capability**

By Suqing Wang<sup>1</sup>, Sirong Li<sup>1</sup>, Yi Sun<sup>1</sup>, Xuyong Feng<sup>1</sup>, Chunhua Chen\*<sup>1</sup>

<sup>1</sup>CAS Key Laboratory of Materials for Energy Conversion, Department of Materials Science and Engineering, University of Science and Technology of China, Hefei, Anhui, 230026 China

\*To whom correspondence should be addressed. Emails: cchchen@ustc.edu.cn

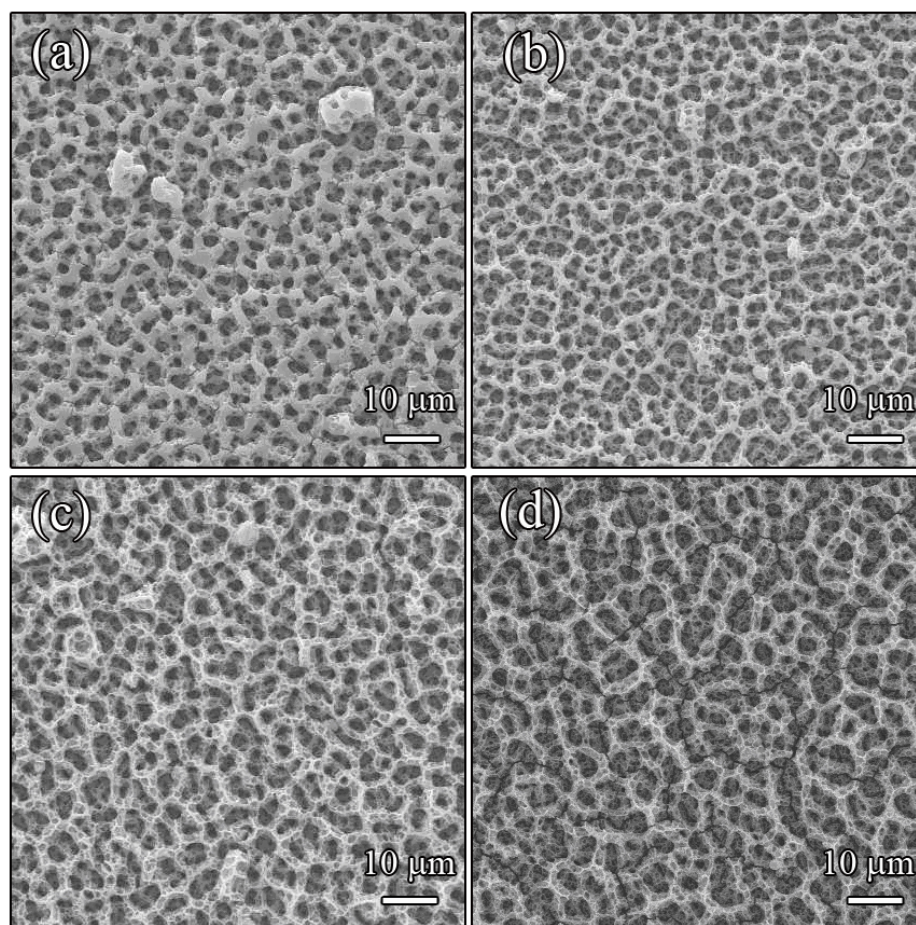

**Figure S1.** Low magnification SEM images of the thin films in different deposit temperatures: (a) 230°C, (b) 245°C, (c) 260°C, (d) 275°C.

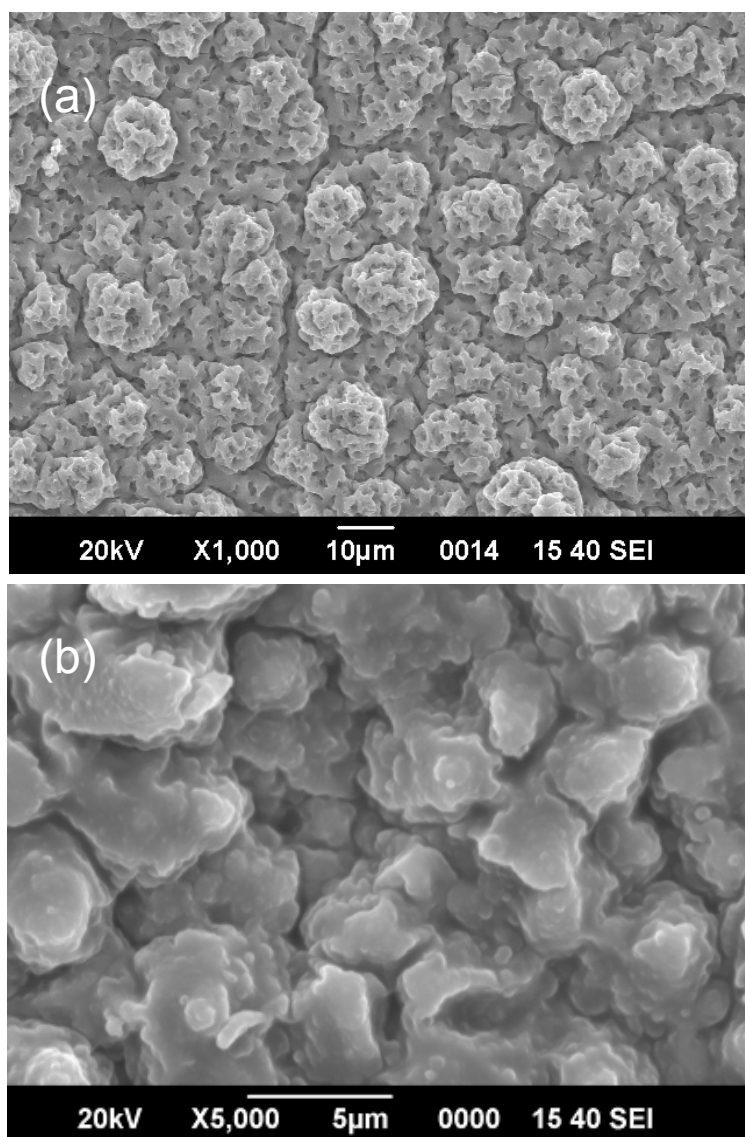

**Figure S2.** SEM image of the vanadium oxide thin film with different solvent: (a) use 1, 2-propylene glycol /Acetone/H<sub>2</sub>O mixture as solvent; (b) the ratio of 1, 2-propylene glycol :ethanol:H<sub>2</sub>O=75:15:10.



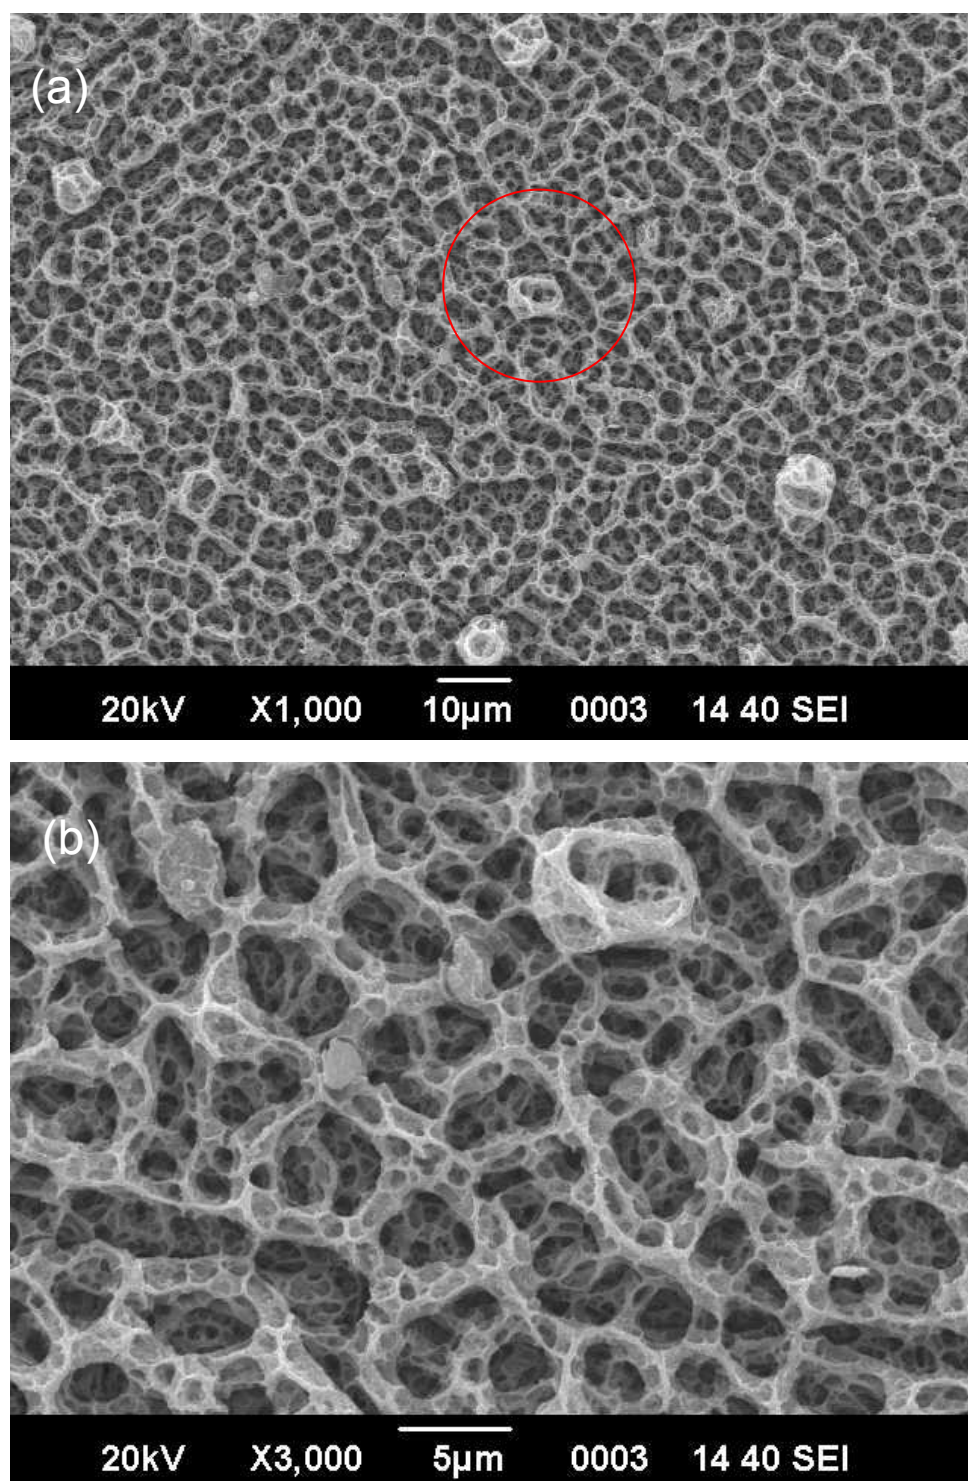

**Figure S3.** SEM images of  $V_2O_5$  thin films

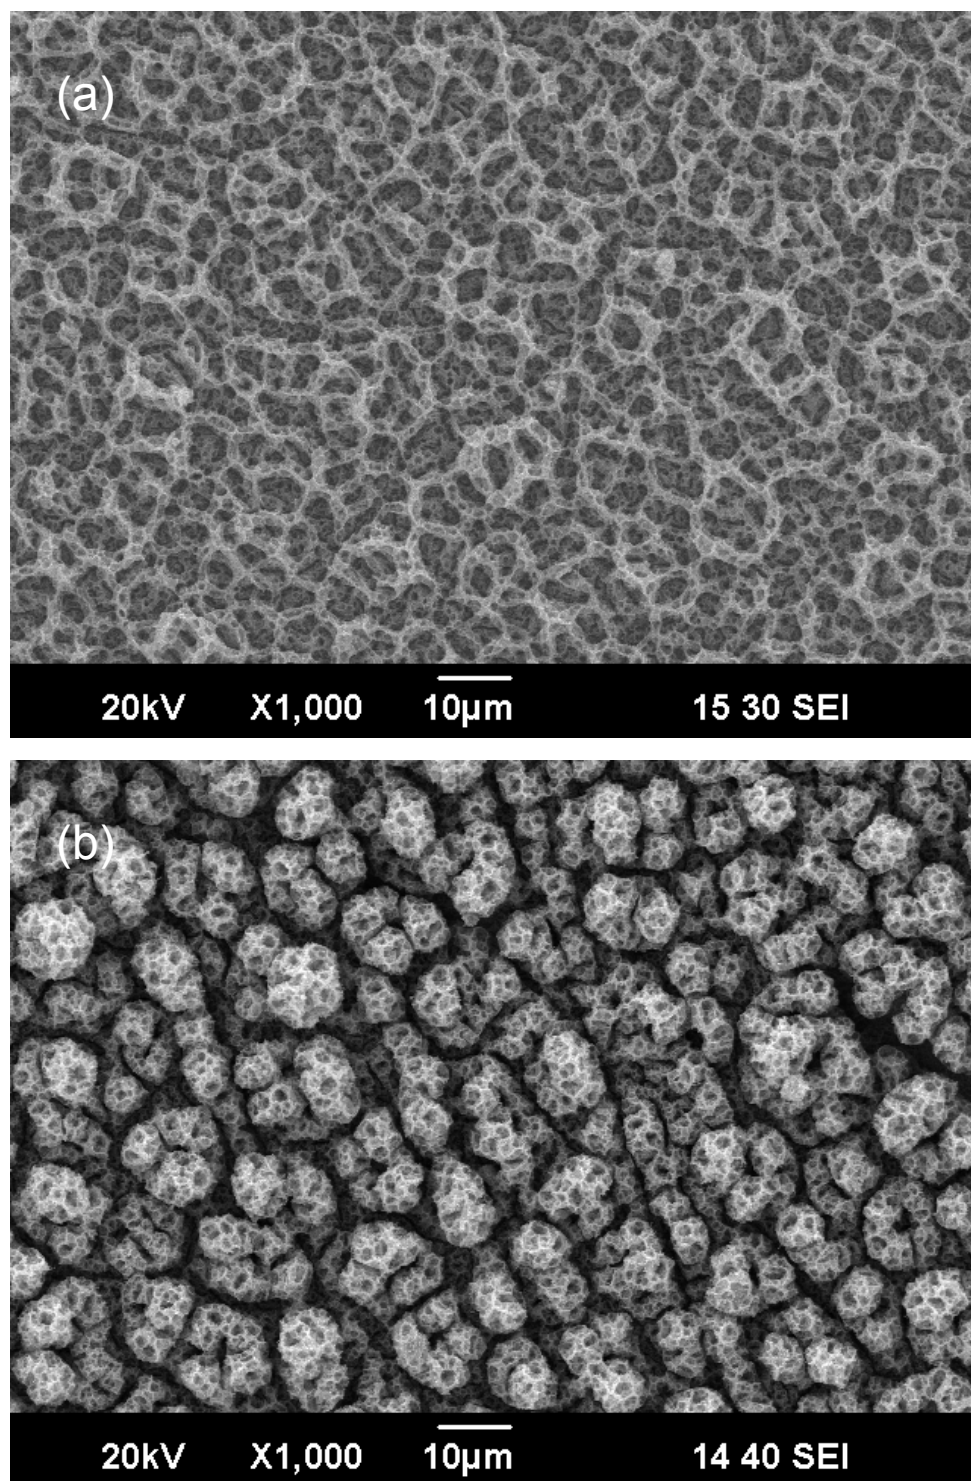

**Figure S4.** SEM images of  $V_2O_5$  thin films after annealing at  $350^\circ\text{C}$  for 2h: (a) the deposit time=2h; (b) the deposit time=4h.

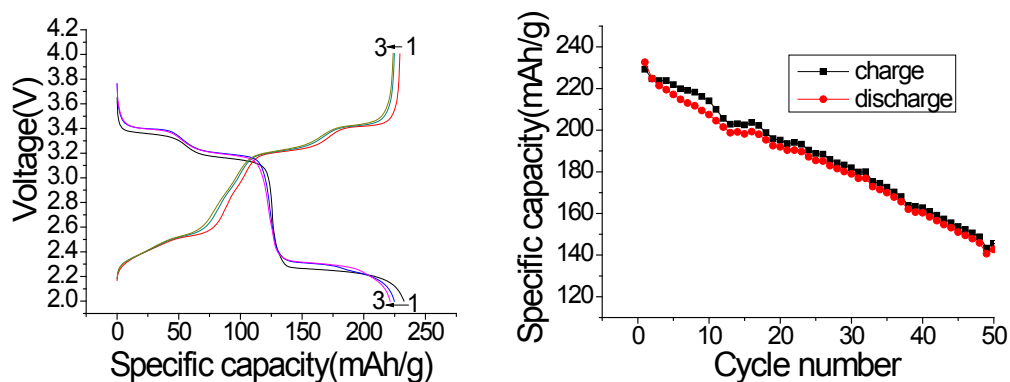

**Figure S5.** Galvanostatic cycling results of 3d-porous  $V_2O_5$  thin film in the range of 1.5-4.0V: (a) first three discharge curves at the voltage range of 2.0-4.0 V, (b) cycling performance.

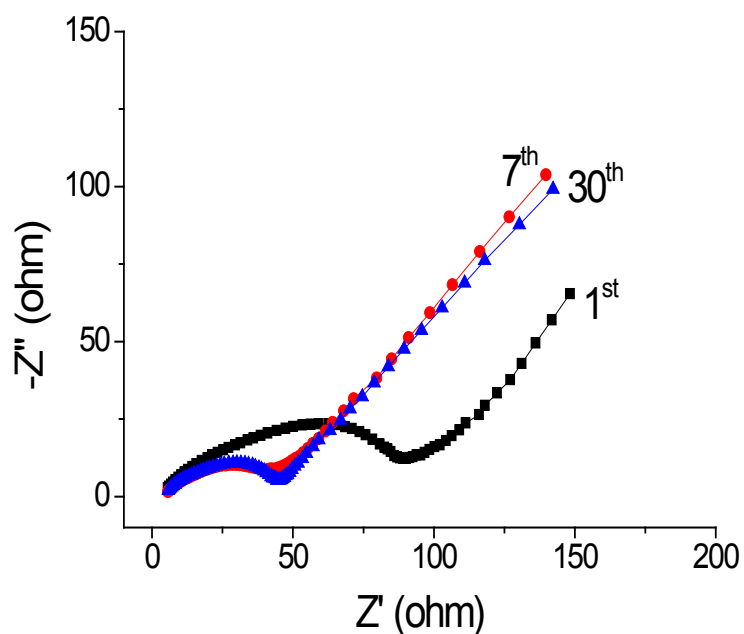

**Figure S6.** AC impedance spectra of  $V_2O_5$  /Li cells after charged to 4.0 V in different cycles (1<sup>st</sup>, 7<sup>th</sup>, and 30<sup>th</sup>).
